# Supplementary material for: BMP2 and TGF-β Cooperate Differently during Synovial-Derived Stem-Cell Chondrogenesis in a Dexamethasone-Dependent Manner
Source: PubMed Central journal article supplement (PMC6628125; doi:10.3390/cells8060636), 2019-06-25
Supplement: cells-08-00636-s001.pdf [file cells-08-00636-s001.pdf]

**SUPPLEMENTARY FILE**

**Supplemental Table S1.** Sequences of primers and probe used for qPCR. Probe modifications: FAM at 3' and NFQ-MGB at 5' end.

| <b>Gene</b>    | <b>Forward primer</b>   | <b>Reverse primer</b>       | <b>Probe</b>                      |
|----------------|-------------------------|-----------------------------|-----------------------------------|
| <i>RPLP0</i>   | TGGGCAAGAACACCATGATG    | CGGATATGAGGCAGCAGTTTC       | AGGGCACCTGGAAAACAACCCAGC          |
| <i>COL2A1</i>  | GGCAATAGCAGGTTACGTACA   | GATAACAGTCTTGCCCCACTTACC    | CCTGAAGGATGGCTGCACGAAACATAC       |
| <i>RUNX2</i>   | AGCAAGGTTCAACGATCTGAGAT | TTTGTGAAGACGGTTATGGTCAA     | TGAAACTCTTGCCTCGTCCACTCCG         |
| <i>COL10A1</i> | ACGCTGAACGATACCAAATG    | TGCTATACCTTTACTCTTTATGGTGTA | ACTACCCAACACCAAGACACAGTTCTTCATTCC |
| <i>MMP13</i>   | CGGCCACTCCTTAGGTCTTG    | TTTTGCCGGTGTAGGTGTAGATAG    | CTCCAAGGACCCTGGAGCACTCATGT        |
| <i>COL1A1</i>  | CCCTGGAAAGAATGGAGATGAT  | ACTGAAACCTCTGTGTCCCTTCA     | CGGGCAATCCTCGAGCACCT              |

**Supplemental Table S2.** List of assays on demand used for qPCR.

| <b>Gene</b>  | <b>Assay ID</b> |
|--------------|-----------------|
| <i>SOX9</i>  | Hs00165814_m1   |
| <i>ACAN</i>  | Hs01050178_m1   |
| <i>SP7</i>   | Hs00541729_m1   |
| <i>PPARG</i> | HS00234592_m1   |
